# Supplementary material
Source: Research Square preprint supplement (doi:10.21203/rs.3.rs-10195860/v1)
Supplement: Supplementary file 1 [file a089b0735f443dd40447ca67.docx]

# Supplementary Table. Association between checklist implementation and the composite clinical outcome

| **Outcome** | **Model** | **OR (95% CI)** | **P value** |
| --- | --- | --- | --- |
| All-cause mortality or any 3-month heart failure readmission | Crude logistic regression | 0.6 (0.25–1.4) | 0.248 |
| All-cause mortality or any 3-month heart failure readmission | Overlap-weighted logistic regression | 0.62 (0.25–1.56) | 0.308 |

The composite clinical outcome was defined as all-cause mortality or any heart failure readmission within 3 months. Crude odds ratios were estimated using logistic regression. Overlap-weighted odds ratios were estimated using propensity score overlap weighting. OR indicates odds ratio; CI, confidence interval.
